# Supplementary material for: Associations between growth, maturation and injury in youth athletes engaged in elite pathways: a scoping review
Source: PubMed Central journal article supplement — Br J Sports Med. 2024 Aug 29;58(17):1001–10. doi: 10.1136/bjsports-2024-108233 (PMC11420720; doi:10.1136/bjsports-2024-108233), 2024-08-29
Supplement: bjsports-2024-108233supp001.pdf [file bjsports-2024-108233supp001.pdf]

| Author/Date             | Study Design                                     | Downs & Black Score (/32) | Sport           | Sample/Sex   | Age Characteristics of Sample | Injury Definition                                                                                                                                                                                                                                                                                                     | Reporting of Injury Outcomes                                                                                                                                                                                                                                                                                                                                          |
|-------------------------|--------------------------------------------------|---------------------------|-----------------|--------------|-------------------------------|-----------------------------------------------------------------------------------------------------------------------------------------------------------------------------------------------------------------------------------------------------------------------------------------------------------------------|-----------------------------------------------------------------------------------------------------------------------------------------------------------------------------------------------------------------------------------------------------------------------------------------------------------------------------------------------------------------------|
| Bowerman et al., (2014) | Prospective 6 months                             | 12                        | Dance           | 30 ♀<br>16 ♂ | Mean age 16.0 ± 1.6 years     | Any physical harm resulting in pain or discomfort that required a dancer to modify their dance activity during one or more classes, or which required a dancer to cease all dance related activity                                                                                                                    | Incidence overall injury rates both as the number of injuries per/1000 dance hours and per/1000 dance exposures. Severity was coded as modified class, off class up to 3 days, or off class more than 3 days.                                                                                                                                                         |
| Bult et al. (2018)      | Prospective 3 years                              | 15                        | Soccer          | 170 ♂        | U12-U19                       | Any physical complaint resulting from a soccer match or training that prevented a player from taking full part in future soccer training or match play                                                                                                                                                                | Injury incidence density (IID) calculated pr subgroup ((number of injuries/hours of exposure) x1000). Incidence Ratio (IR) calculated as change of sustaining an injury compared chance in total group (IID subgroup)/(IID total group). Injury Burden calculated as (number of injuries x median number of time-loss days pr injury) per/1000 hours soccer exposure. |
| Fourchet et al., (2011) | Prospective 3 seasons                            | 12                        | Track and Field | 110 ♂        | 13-18 years                   | A trauma occurring during track and field training or competition, which required one or more physiotherapy treatments and prevented the athlete from participating in one or more training sessions or competitive events.                                                                                           | Injury Rate no definition provided. Injury Severity defined basis of time-loss minor athlete out of training/competition for 1-3days, moderate absence lasted 4-7 days, major if absence was 1-3 weeks, sever absence greater than 3 weeks.                                                                                                                           |
| Hall et al., (2022)     | Prospective 1 year                               | 18                        | Soccer          | 502 ♂        | 9-23 years                    | Injury diagnosis and recording by club medics followed published guidelines of Fuller et al, 2006 Any physical complaint requiring the attention of medical staff which occurred during squash related training (specific squash training, strength and conditioning) and competition or non-squash related training. | Injury Incidence rates (IRR) presented as number of injuries per/1000 hours. Injury Prevalence Proportions (IPP) defined as percentage of players injured.                                                                                                                                                                                                            |
| Horobeau et al (2019)   | Prospective 1 year across 6 playing season years | 10                        | Squash          | 21 ♂         | Mean age 14.5 ± 1.7 years     | Traumatic injury: injury resulting from a specific and identifiable mechanism, including contact and non-contact circumstances with acute onset. Overuse injuries: injuries resulting from insidious onset without a recognizable                                                                                     | Injury Incidence per/1000 hours exposure<br>Injury Severity defined on number of days absent from usual sports participation classified as slight (1day), minimal (2-3 days), mild (4-                                                                                                                                                                                |

|                        |                                                |    |        |       |            |                                                                                                                                                                                                                                                                                                                                                                                                                                       |                                                                                                                                                                                                                                                                                                                                                                                                                  |
|------------------------|------------------------------------------------|----|--------|-------|------------|---------------------------------------------------------------------------------------------------------------------------------------------------------------------------------------------------------------------------------------------------------------------------------------------------------------------------------------------------------------------------------------------------------------------------------------|------------------------------------------------------------------------------------------------------------------------------------------------------------------------------------------------------------------------------------------------------------------------------------------------------------------------------------------------------------------------------------------------------------------|
|                        |                                                |    |        |       |            | mechanism.<br>Growth condition injuries, which are unique to young athletes, resulted from an increase in the involvement in squash activities                                                                                                                                                                                                                                                                                        | 7days), moderately serious (8-28 days), serious (>28 days-6 months) or long-term (>6 months).                                                                                                                                                                                                                                                                                                                    |
| Johnson et al (2020)   | Prospective 2 year                             | 15 | Soccer | 76 ♂  | U11-U16    | Time-loss injuries preventing a player from participating in full training or matches. This study only considered non-contact injuries defined as those sustained by a player without extrinsic contact by another player or other object on the field of play                                                                                                                                                                        | Time loss defined as prevention of a player from participating in full training or matches. Training. Injury burden - non-contact injuries only defined as sustained by a player without extrinsic contact by another player or other object on the field of play.                                                                                                                                               |
| Johnson et al (2022)   | Prospective 1 year                             | 18 | Soccer | 49 ♂  | U13-U16    | A time-loss injury defined as a player being unable to take part in full football training or match play. Only injuries that occurred during training, gym or football competition were counted, those unrelated to academy activities were not recorded. Only non-contact injuries were analysed; these were defined as those sustained by a player without extrinsic contact by another player or other object on the field of play | Injury incidence a total value (cumulative value) and as the number of injuries per/1,000 player-hours<br>Injury severity the number of days elapsed between the initial injury date and the player's return to full availability for training and/or matches. Injury burden was given by the injury incidence rate multiplied by the mean days missed per injury, giving the days of absence per 1000 hours per |
| Johnson et al (2009)   | Prospective 6 years                            | 13 | Soccer | 292 ♂ | 9-16 years | No clear definition - only injuries associated with training and match play, those not related to playing football were excluded                                                                                                                                                                                                                                                                                                      | Injury incidence injuries each player per/1000 hours total exposure, and total injuries per/1000 hours training and match play.<br>Burden - days lost per/season averaged to injury days per/player season                                                                                                                                                                                                       |
| Kemper et al (2015)    | Prospective 1 season                           | 10 | Soccer | 101 ♂ | U12-U19    | Injuries defined following the FIFA Consensus Model for Injury Registration, included registration of type, severity, mechanism of injury (acute or overuse) and activity                                                                                                                                                                                                                                                             | Injury incidence defined number injuries per/1000 hours training and match hours.<br>Injury rate per/1000 hours match and training in matches<br>Burden - the mean (SD) number of time loss from soccer activities                                                                                                                                                                                               |
| Le Gall et al., (2007) | Prospective 1 year across 10 different seasons | 12 | Soccer | 233 ♂ | U14        | A recordable injury defined an injury received during training or competition that prevented the injured player from participating in normal training or                                                                                                                                                                                                                                                                              | Injury incidence was calculated as the number of injuries per/1000-h exposure in training and matches<br>Injury severity depended upon the time the player was absent from                                                                                                                                                                                                                                       |

|                              |                               |    |          |                                            |             |                                                                                                                                                                                                                                                                                                                                                                                                                                                                |                                                                                                                                                                                                                                        |
|------------------------------|-------------------------------|----|----------|--------------------------------------------|-------------|----------------------------------------------------------------------------------------------------------------------------------------------------------------------------------------------------------------------------------------------------------------------------------------------------------------------------------------------------------------------------------------------------------------------------------------------------------------|----------------------------------------------------------------------------------------------------------------------------------------------------------------------------------------------------------------------------------------|
|                              |                               |    |          |                                            |             | competition for more than 48h, not including the day of the injury                                                                                                                                                                                                                                                                                                                                                                                             | training or competition and was classed into four sub-divisions, as major (more than 4 weeks), moderate (1–4 weeks), mild (4–7 days) and minor (2–3 days)                                                                              |
| Light et al (2020)           | Prospective over 4 seasons    | 14 | Soccer   | 190 ♂                                      | U9-U21      | Injury resulting from playing football and leading to a player being unable to fully participate in future training or match play (i.e., time-loss injury).                                                                                                                                                                                                                                                                                                    | Injury count<br>Injury frequency and incidence per/1000 playing hours<br>Severity - time loss from training or match play in days, classified as minimal, mild, moderate and severe                                                    |
| Materne et al (2021)         | Prospective over 4 seasons    | 16 | Soccer   | 283 ♂                                      | U13-U19     | Injury recorded as a result of any physical complaint resulting from a game or training that required the attention of the medical staff. Medical department visit requiring a clinical examination without missing a full training session or game was classified as a medical attention injury. A visit resulting in a player being unable to fully participate in the training session or game the following day was classified as a time-loss injury (TLI) | Total number of injuries<br>Time-loss injury incidence via injuries per/squad-season<br>Burden - days lost per/squad-season<br>Frequency, prevalence and incidence per/squad-season<br>presented injury types and locations            |
| Monaco et al (2019)          | Prospective over 2 seasons    | 8  | Handball | Total sample 133<br>♂ youth<br>31 ♂ adults | 12-27 years | Injury defined via UEFA guidance as any injury occurring during a training session or match and causing an absence for at least the next training session or match (time-loss injury).                                                                                                                                                                                                                                                                         | Injury incidence calculated as the number of injuries per 1000 player h ( $\Sigma$ injuries/ $\Sigma$ exposure h $\times$ 1000)<br>Injury prevalence presented by number of injuries and injury types                                  |
| Monasterio et al EJSS (2023) | Prospective over 20 seasons   | 14 | Soccer   | 110 ♂                                      | 10-17 years | Injury defined as a physical complaint that prevented players from participating in future training sessions or matches. Described via the FIFA consensus                                                                                                                                                                                                                                                                                                      | Incidence calculated via time-loss in days per/player-season<br>Injury burden accounted for both frequency (incidence) and severity (mean absence) of injuries, Injury burdens were presented as number of days lost per/player-season |
| Monasterio et al IJSM (2023) | Retrospective over 20 seasons | 13 | Soccer   | 124 ♂                                      | 10-18 years | Injury defined as when a player was unable to participate in a future training session or match due to a physical complaint resulting from a soccer training or match. Classification based on FIFA consensus                                                                                                                                                                                                                                                  | Incidence determined via time-loss days per/player-season<br>Burden - number of days lost per/player-season including both frequency (incidence) and severity (mean absence) of injuries                                               |

|                                                  |                                   |    |                         |              |                                                   |                                                                                                                                                                                                                                                                                                                                              |                                                                                                                                                                                                                                                                                                                                                                                                                                                                                                                                  |
|--------------------------------------------------|-----------------------------------|----|-------------------------|--------------|---------------------------------------------------|----------------------------------------------------------------------------------------------------------------------------------------------------------------------------------------------------------------------------------------------------------------------------------------------------------------------------------------------|----------------------------------------------------------------------------------------------------------------------------------------------------------------------------------------------------------------------------------------------------------------------------------------------------------------------------------------------------------------------------------------------------------------------------------------------------------------------------------------------------------------------------------|
| Monasterio, I. Bidaurrezaga-Letona, et al (2022) | Prospective 1 year over 9 seasons | 17 | Soccer                  | 183 ♂        | U14                                               | Injuries were recorded when a player was unable to participate in a future training session or match due to a physical complaint. Classified via FIFA guidelines                                                                                                                                                                             | Injury burden was calculated to account for both frequency (incidence) and severity (mean absence) of injuries and was presented as the number of days lost per/1000 player hours. Injury burden of early versus on-time versus late matures were compared by calculating rate ratios (RRs)                                                                                                                                                                                                                                      |
| Monasterio, S.M. Gil, et al (2021)               | Prospective over 10 years         | 15 | Soccer                  | 63 ♂         | 10.7 ± 0.4. years inclusion criteria Inc. U11-U19 | The club's medical staff diagnosed, treated, and recorded all time-loss injuries. From the 2007–2008 season, this was done following the consensus on definitions and data collection procedures outlined by the International Federation of Association Football (FIFA)                                                                     | Number and frequency of injury types                                                                                                                                                                                                                                                                                                                                                                                                                                                                                             |
| Muller et al (2017)                              | Prospective 2 seasons             | 16 | Alpine Skiing           | 31 ♀<br>51 ♂ | 9-14 years                                        | Traumatic injury defined as injury with a sudden onset based on time loss, classified via injury-surveillance consensus paper of the International Olympic Committee. Overuse injury was defined as any physical complaint that was not attributable to a single identifiable event and caused time loss from full participation in training | Incidence defined per 1,000 hours of training exposure (athletic and skiing-specific) was assessed by the number of injuries divided by total number of hours of exposure multiplied by 1,000<br>Prevalence calculated via traumatic, overuse or illness<br>Injury severity classified via time loss - minimal, time loss of 1–3 days; mild, 4–7 days; moderate, 8–28 days; severe, >28 days; injury causing end of career                                                                                                       |
| Patel et al., (2021)                             | Prospective 8 weeks               | 13 | Gymnastics - Trampoline | 8 ♀<br>13 ♂  | 9-19 years                                        | "All-complaints" definition of injury was used                                                                                                                                                                                                                                                                                               | Prevalence of injury amongst gymnasts was calculated for each week by dividing the number of gymnasts reporting an injury by the total number of gymnasts completing a training diary. The same method was used to calculate the prevalence of injury that resulted in modified training. Severity was reported as time lost (number of days that the player was not able to take full part in competition or training): slight for 0 days; minimal for 1–3 days; mild for 4–7 days; moderate for 8–28 days; severe for >28 days |
| Rinaldo et al (2021)                             | Prospective 1 season              | 17 | Soccer                  | 88 ♂         | U9-U13                                            | Injuries defined as any physical complaint suffered by a player resulting from a soccer match or training, regardless of the necessity of medical care or time lost from soccer activities.                                                                                                                                                  | Severity was reported as time lost (number of days that the player was not able to take full part in competition or training): slight for 0 days; minimal for 1–3 days; mild for 4–7 days; moderate for 8–28 days; severe for >28 days                                                                                                                                                                                                                                                                                           |

|                          |                       |    |                |              |                                           |                                                                                                                                                                                                                                                                                                                                                    |                                                                                                                                                                                                                                                                                                                                                             |
|--------------------------|-----------------------|----|----------------|--------------|-------------------------------------------|----------------------------------------------------------------------------------------------------------------------------------------------------------------------------------------------------------------------------------------------------------------------------------------------------------------------------------------------------|-------------------------------------------------------------------------------------------------------------------------------------------------------------------------------------------------------------------------------------------------------------------------------------------------------------------------------------------------------------|
|                          |                       |    |                |              |                                           |                                                                                                                                                                                                                                                                                                                                                    | injury incidence as the number of injuries per 1000 exposure player-hours in training and matches, as follows: $(\sum \text{injuries} / \sum \text{exposure hours}) \times 1000$<br>Prevalence of overuse and acute injuries                                                                                                                                |
| Read et al., (2018)      | Prospective 1 season  | xx | Soccer         | 356 ♂        | U11-U18                                   | Non-contact lower extremity injuries that occurred during footballing activity resulting in player not being able to participate for 48 hours, not including day of incident                                                                                                                                                                       | Injuries recorded by each club's respective medical personnel in accordance with methods outlined in Premier League's EPPP policy.                                                                                                                                                                                                                          |
| Rommers et al (2021)     | Prospective 2 seasons | 19 | Soccer         | 378 ♂        | U13-U15                                   | Injury defined as any injury that required medical attention or an assessment by medical or paramedical staff                                                                                                                                                                                                                                      | Individual football exposure was recorded by the teams' coaches in minutes. Attendance at training as well as individual playing time during matches were registered after each training session or match. We used the individual average weekly exposure before occurrence of the first injury in our analyses.                                            |
| Rommers et al (2020)     | Prospective 1 year    | 16 | Soccer         | 314 ♂        | U10-U15                                   | Injury was defined as a medical attention injury, that is, any injury that required an assessment of medical or paramedical staff.                                                                                                                                                                                                                 | injury incidence defined as the number of overuse or acute injuries per/player-season<br>Injury burden defined as the number of days lost per/player-season                                                                                                                                                                                                 |
| Rudavsky et al (2020)    | Prospective 2 year    | 13 | Dance - Ballet | 34 ♀<br>24 ♂ | 11-18 years                               | Ultrasound images used to determine presence of patella tendinopathy                                                                                                                                                                                                                                                                               | Prevalence of patella tendinopathy across dancers<br>Injury incidence of per/1000 h of training                                                                                                                                                                                                                                                             |
| Steidl-Muller et al 2020 | Prospective 1 season  | 16 | Alpine-Skiing  | 39 ♀<br>50 ♂ | mean age: 12.1 ± 1.3 years<br>10-14 years | Traumatic injury was defined as an injury with a sudden onset based on time-loss definition.<br>An overuse injury was defined as any physical complaint without a single identifiable event being responsible<br>Type of injury and body part defined according to the injury surveillance consensus paper of the International Olympic Committee. | Prevalence defined number of overuse and traumatic<br>Burden defined by injury severity was classified via time loss of 1–3 days, as mild (4–7 days), moderate (8–28 days), severe (>28 days), or career ending<br>Mean injury severity of each athlete was calculated (total days of absence due to traumatic and overuse injury/total number of injuries) |

|                            |                     |    |                 |      |                                            |                                                                                                                                                                                                                                                                                                                                                                                                                                   |                                                                                                                                                                                                                                                                                                                                                                                                                                                                                 |
|----------------------------|---------------------|----|-----------------|------|--------------------------------------------|-----------------------------------------------------------------------------------------------------------------------------------------------------------------------------------------------------------------------------------------------------------------------------------------------------------------------------------------------------------------------------------------------------------------------------------|---------------------------------------------------------------------------------------------------------------------------------------------------------------------------------------------------------------------------------------------------------------------------------------------------------------------------------------------------------------------------------------------------------------------------------------------------------------------------------|
| van der Sluis et al (2014) | Prospective 3 years | 11 | Soccer          | 26 ♂ | mean age at commencement: 11.9 ± 0.8 years | Injury defined as: Any physical complaint sustained by a player that results from a soccer match or a soccer training, irrespective of the need for medical attention or time loss from soccer activities                                                                                                                                                                                                                         | Training and match injury incidence was calculated as the number of injuries per 1000h of exposure in training and matches. Severity of the injury was deemed slight (no absence from training session or match, also recorded as "medical attention injury"), minimal (1–3 days time loss), mild (4–7 days time loss), moderate (8–28 days time loss), severe (more than 28 days time loss) and career-ending injuries. Prevalence presented as overuse or traumatic injuries. |
| van der Sluis et al (2015) | Prospective 3 years | 7  | Soccer          | 26 ♂ | mean age at commencement: 11.9 ± 0.8 years | An injury was defined as: "any physical complaint sustained by a player that results from a soccer match or a soccer training, irrespective of the need for medical attention or time loss from soccer activities" Following FIFA consensus statement                                                                                                                                                                             | Injury incidence defined as number of days that the player was not able to take full part in competition or training sessions. Severity of the injury was deemed slight (no absence from training session or match, also recorded as "medical attention injury"), minimal (1–3 days time loss), mild (4–7 days time loss), moderate (8–28 days time loss), severe (more than 28 days time loss) and career-ending injuries. Presented as overuse or traumatic injuries.         |
| Wik et al (2020)           | Prospective 4 years | 19 | Track and Field | 85 ♂ | 11-17 years                                | Time-loss injury as defined as the athlete not being able to fully take part in athletics training and/or competition the day after the incident occurred (min 1 day lost). Entries in the injury database were classified as either "sudden onset" or "gradual onset" based on consensus definitions. Sudden onset injuries that did not originate from athletics training sessions or competitions were excluded from analyses. | Incidence defined as rate-ratios. Days lost was calculated based on the date of clinical examination and the date of return to full participation. Burden classified via severity (Minor: 1-7 days lost, Moderate: 8-28 days lost, Serious: >28 days lost).                                                                                                                                                                                                                     |

| Author/Date            | Study Design               | JBI Critical Checklist (/10) | Sport      | Sample/Sex                            | Age Range | Injury Definition                                                                       | Reporting of Injury Outcomes                                                                                                                                                                                                                                                                                                                                                                                                                                                                                        |
|------------------------|----------------------------|------------------------------|------------|---------------------------------------|-----------|-----------------------------------------------------------------------------------------|---------------------------------------------------------------------------------------------------------------------------------------------------------------------------------------------------------------------------------------------------------------------------------------------------------------------------------------------------------------------------------------------------------------------------------------------------------------------------------------------------------------------|
| Fawcett et al., (2020) | Qualitative Phenomenology  | 8                            | Gymnastics | 10 MDT National Team support staff    | N/A       | Lower Back Pain (LBO) presentation and causation                                        | Lower Back Pain and Injury                                                                                                                                                                                                                                                                                                                                                                                                                                                                                          |
| Patel et al., (2021)   | Qualitative - Interpretive | 8                            | Gymnastics | 44 MDT National Support Staff Coaches | N/A       | Injury themes around as injury causes, injury types and injury prevention were explored | 7 key themes pertaining to adolescent injury established<br>1) Physical changes during growth and maturation<br>2) Temporary skill loss/confusion in youth gymnasts<br>3) Psychological challenges in pubertal gymnasts<br>4. Injuries in youth gymnasts - causes, types, injury prevention during growth<br>5. Training load in youth gymnasts - planned training, adapting training<br>6) Monitoring growth and maturity in young gymnasts<br>7. Gymnastics specific medical and scientific knowledge and support |

APHV = Age at Peak Height Velocity, BMI = Body Mass Index, FIFA = Federation Internationale de Football Association, IRR – Injury Incidence Rate, IPP = Injury Prevalence Proportions, LBP = Lower Back Pain, MDT = Multidisciplinary team, PHV = Peak height Velocity, SD = Standard Deviation, UEFA = Union of European Football Associations, %PAH = Percentage of Predicted Adult Height
