# Supplementary material for: Associations between growth, maturation and injury in youth athletes engaged in elite pathways: a scoping review
Source: PubMed Central journal article supplement — Br J Sports Med. 2024 Aug 29;58(17):1001–10. doi: 10.1136/bjsports-2024-108233 (PMC11420720; doi:10.1136/bjsports-2024-108233), 2024-08-29
Supplement: bjsports-2024-108233supp002.pdf [file bjsports-2024-108233supp002.pdf]

## Downs &amp; Black Quality Assessment

| Author                                           | Is the hypothesis/aim/objective of the study clearly described? |
|--------------------------------------------------|-----------------------------------------------------------------|
| Bowerman et al., (2014)                          | 1                                                               |
| Bult et al. (2018)                               | 1                                                               |
| Fourchet et al., (2011)                          | 1                                                               |
| Hall et al., (2022)                              | 1                                                               |
| Horobeanu et al (2007)                           | 1                                                               |
| Johnson (DM) et al (2020)                        | 1                                                               |
| Johnson (DM) et al (2022)                        | 1                                                               |
| Johnson et al (2009)                             | 0                                                               |
| Kemper et al (2015)                              | 1                                                               |
| Le Gall et al., (2007)                           | 1                                                               |
| Light et al (2020)                               | 1                                                               |
| Materne et al (2021)                             | 1                                                               |
| Monaco et al (2019)                              | 1                                                               |
| Monasterio et al - EJSS (2023)                   | 1                                                               |
| Monasterio et al - IJSM (2023)                   | 1                                                               |
| Monasterio, I. Bidaurrezaga-Letona, et al (2022) | 1                                                               |
| Monasterio, S.M. Gil, et al (2021)               | 1                                                               |
| Muller et al (2017)                              | 1                                                               |
| Patel et al - JSS (2021)                         | 1                                                               |
| Read et al (2018)                                | 1                                                               |
| Rinaldo et al (2021)                             | 1                                                               |
| Rommers et al (2021)                             | 1                                                               |
| Rommers,et al (2020)                             | 1                                                               |
| Rudavsky et al (2020)                            | 1                                                               |
| Steidl-Mueller et al 2020                        | 1                                                               |
| van der Sluis et al (2014)                       | 1                                                               |
| van der Sluis et al (2015)                       | 1                                                               |
| Wik et al (2020)                                 | 1                                                               |

ient

yes=1

| Are the main outcomes to be measured clearly described in the Introduction or Methods section? | Are the characteristics of the patients included in the study clearly described? | Are the interventions of interest clearly described? |
|------------------------------------------------------------------------------------------------|----------------------------------------------------------------------------------|------------------------------------------------------|
| 1                                                                                              | 1                                                                                | 1                                                    |
| 1                                                                                              | 0                                                                                | 1                                                    |
| 1                                                                                              | 1                                                                                | 1                                                    |
| 1                                                                                              | 1                                                                                | 1                                                    |
| 1                                                                                              | 1                                                                                | 1                                                    |
| 1                                                                                              | 0                                                                                | 1                                                    |
| 1                                                                                              | 0                                                                                | 1                                                    |
| 1                                                                                              | 0                                                                                | 1                                                    |
| 1                                                                                              | 0                                                                                | 1                                                    |
| 1                                                                                              | 0                                                                                | 1                                                    |
| 1                                                                                              | 1                                                                                | 1                                                    |
| 0                                                                                              | 1                                                                                | 0                                                    |
| 1                                                                                              | 1                                                                                | 1                                                    |
| 1                                                                                              | 1                                                                                | 1                                                    |
| 1                                                                                              | 0                                                                                | 1                                                    |
| 1                                                                                              | 1                                                                                | 1                                                    |
| 1                                                                                              | 1                                                                                | 1                                                    |
| 1                                                                                              | 1                                                                                | 1                                                    |
| 1                                                                                              | 0                                                                                | 0                                                    |
| 1                                                                                              | 1                                                                                | 0                                                    |
| 1                                                                                              | 1                                                                                | 1                                                    |
| 1                                                                                              | 0                                                                                | 1                                                    |
| 1                                                                                              | 0                                                                                | 1                                                    |
| 1                                                                                              | 1                                                                                | 1                                                    |

; no=0, UTD unable to determine

| Are the distributions of principal confounders in each group of subjects to be compared clearly described? (Y=2, Partial =1, No =0) | Are the main findings of the study clearly described? | Does the study provide estimates of the random variability in the data for the main outcomes? |
|-------------------------------------------------------------------------------------------------------------------------------------|-------------------------------------------------------|-----------------------------------------------------------------------------------------------|
| 0                                                                                                                                   | 1                                                     | 0                                                                                             |
| 0                                                                                                                                   | 1                                                     | 0                                                                                             |
| 0                                                                                                                                   | 1                                                     | 0                                                                                             |
| 1                                                                                                                                   | 1                                                     | 1                                                                                             |
| 1                                                                                                                                   | 1                                                     | 0                                                                                             |
| 1                                                                                                                                   | 1                                                     | 0                                                                                             |
| 1                                                                                                                                   | 1                                                     | 1                                                                                             |
| 0                                                                                                                                   | 1                                                     | 0                                                                                             |
| 0                                                                                                                                   | 1                                                     | 0                                                                                             |
| 0                                                                                                                                   | 1                                                     | 0                                                                                             |
| 0                                                                                                                                   | 0                                                     | 1                                                                                             |
| 1                                                                                                                                   | 1                                                     | 0                                                                                             |
| 0                                                                                                                                   | 1                                                     | 0                                                                                             |
| 0                                                                                                                                   | 1                                                     | 1                                                                                             |
| 1                                                                                                                                   | 1                                                     | 0                                                                                             |
| 1                                                                                                                                   | 1                                                     | 1                                                                                             |
| 1                                                                                                                                   | 1                                                     | 0                                                                                             |
| 1                                                                                                                                   | 1                                                     | 0                                                                                             |
| 0                                                                                                                                   | 1                                                     | 0                                                                                             |
| 1                                                                                                                                   | 1                                                     | 0                                                                                             |
| 0                                                                                                                                   | 1                                                     | 0                                                                                             |
| 1                                                                                                                                   | 1                                                     | 0                                                                                             |
| 1                                                                                                                                   | 1                                                     | 0                                                                                             |
| 0                                                                                                                                   | 1                                                     | 0                                                                                             |
| 0                                                                                                                                   | 1                                                     | 0                                                                                             |
| 0                                                                                                                                   | 1                                                     | 0                                                                                             |
| 0                                                                                                                                   | 1                                                     | 0                                                                                             |
| 1                                                                                                                                   | 1                                                     | 0                                                                                             |

| Have all important adverse events that may be a consequence of the intervention been reported? | Have the characteristics of patients lost to follow-up been described? | Have actual probability values been reported (e.g. 0.035 rather than <0.05) for the main outcomes except where the probability value is less than 0.001? |
|------------------------------------------------------------------------------------------------|------------------------------------------------------------------------|----------------------------------------------------------------------------------------------------------------------------------------------------------|
| 0                                                                                              | 0                                                                      | 0                                                                                                                                                        |
| 0                                                                                              | 0                                                                      | 1                                                                                                                                                        |
| 0                                                                                              | 0                                                                      | 0                                                                                                                                                        |
| 0                                                                                              | 0                                                                      | 1                                                                                                                                                        |
| 0                                                                                              | 0                                                                      | 0                                                                                                                                                        |
| 0                                                                                              | 0                                                                      | 1                                                                                                                                                        |
| 0                                                                                              | 0                                                                      | 1                                                                                                                                                        |
| 0                                                                                              | 0                                                                      | 0                                                                                                                                                        |
| 0                                                                                              | 0                                                                      | 0                                                                                                                                                        |
| 0                                                                                              | 0                                                                      | 1                                                                                                                                                        |
| 0                                                                                              | 0                                                                      | 0                                                                                                                                                        |
| 0                                                                                              | 1                                                                      | 0                                                                                                                                                        |
| 0                                                                                              | 0                                                                      | 0                                                                                                                                                        |
| 0                                                                                              | 0                                                                      | 1                                                                                                                                                        |
| 0                                                                                              | 0                                                                      | 0                                                                                                                                                        |
| 0                                                                                              | 0                                                                      | 0                                                                                                                                                        |
| 0                                                                                              | 0                                                                      | 0                                                                                                                                                        |
| 0                                                                                              | 1                                                                      | 0                                                                                                                                                        |
| 0                                                                                              | 0                                                                      | 1                                                                                                                                                        |
| 0                                                                                              | 0                                                                      | 1                                                                                                                                                        |
| 0                                                                                              | 0                                                                      | 0                                                                                                                                                        |
| 0                                                                                              | 0                                                                      | 1                                                                                                                                                        |
| 0                                                                                              | 0                                                                      | 0                                                                                                                                                        |
| 0                                                                                              | 0                                                                      | 0                                                                                                                                                        |
| 0                                                                                              | 0                                                                      | 0                                                                                                                                                        |
| 0                                                                                              | 0                                                                      | 0                                                                                                                                                        |
| 0                                                                                              | 0                                                                      | 1                                                                                                                                                        |
| 0                                                                                              | 0                                                                      | 0                                                                                                                                                        |
| 0                                                                                              | 0                                                                      | 0                                                                                                                                                        |
| 0                                                                                              | 0                                                                      | 1                                                                                                                                                        |
| 0                                                                                              | 0                                                                      | 0                                                                                                                                                        |
| 0                                                                                              | 1                                                                      | 0                                                                                                                                                        |

| Were the subjects asked to participate in the study representative of the entire population from which they were recruited? | Were those subjects who were prepared to participate representative of the entire population from which they were recruited? | Were the staff, places, and facilities where the patients were treated, representative of the treatment the majority of patients received? |
|-----------------------------------------------------------------------------------------------------------------------------|------------------------------------------------------------------------------------------------------------------------------|--------------------------------------------------------------------------------------------------------------------------------------------|
| 1                                                                                                                           | 1                                                                                                                            | UTD                                                                                                                                        |
| 1                                                                                                                           | 0                                                                                                                            | 1                                                                                                                                          |
| 1                                                                                                                           | 0                                                                                                                            | 0                                                                                                                                          |
| 1                                                                                                                           | 1                                                                                                                            | 1                                                                                                                                          |
| 1                                                                                                                           | 0                                                                                                                            | 1                                                                                                                                          |
| 0                                                                                                                           | 1                                                                                                                            | 1                                                                                                                                          |
| 0                                                                                                                           | 1                                                                                                                            | 1                                                                                                                                          |
| 0                                                                                                                           | 1                                                                                                                            | 1                                                                                                                                          |
| 1                                                                                                                           | 1                                                                                                                            | 1                                                                                                                                          |
| 0                                                                                                                           | 1                                                                                                                            | 1                                                                                                                                          |
| 0                                                                                                                           | 1                                                                                                                            | 1                                                                                                                                          |
| 1                                                                                                                           | 1                                                                                                                            | 1                                                                                                                                          |
| 0                                                                                                                           | 1                                                                                                                            | 1                                                                                                                                          |
| 0                                                                                                                           | 0                                                                                                                            | 1                                                                                                                                          |
| 0                                                                                                                           | 0                                                                                                                            | 1                                                                                                                                          |
| 1                                                                                                                           | 1                                                                                                                            | 1                                                                                                                                          |
| 1                                                                                                                           | 1                                                                                                                            | 1                                                                                                                                          |
| 0                                                                                                                           | 1                                                                                                                            | UTD                                                                                                                                        |
| 0                                                                                                                           | 1                                                                                                                            | 1                                                                                                                                          |
| 1                                                                                                                           | UTDD                                                                                                                         | 1                                                                                                                                          |
| 0                                                                                                                           | 1                                                                                                                            | 1                                                                                                                                          |
| 1                                                                                                                           | 1                                                                                                                            | 1                                                                                                                                          |
| 1                                                                                                                           | 1                                                                                                                            | 1                                                                                                                                          |
| 0                                                                                                                           | 1                                                                                                                            | 1                                                                                                                                          |
| 1                                                                                                                           | 1                                                                                                                            | 1                                                                                                                                          |
| 0                                                                                                                           | 0                                                                                                                            | 1                                                                                                                                          |
| 1                                                                                                                           | 0                                                                                                                            | 1                                                                                                                                          |
| 1                                                                                                                           | 1                                                                                                                            | 1                                                                                                                                          |

| Was an attempt made to blind study subjects to the intervention they have received? | Was an attempt made to blind those measuring the main outcomes of the intervention? | If any results were due to "data dredging", was this made clear? |
|-------------------------------------------------------------------------------------|-------------------------------------------------------------------------------------|------------------------------------------------------------------|
| 0                                                                                   | 0                                                                                   | 1                                                                |
| 0                                                                                   | 0                                                                                   | 1                                                                |
| 0                                                                                   | 0                                                                                   | 1                                                                |
| 0                                                                                   | 0                                                                                   | 1                                                                |
| 0                                                                                   | 0                                                                                   | 0                                                                |
| 0                                                                                   | 0                                                                                   | 1                                                                |
| 0                                                                                   | 0                                                                                   | 1                                                                |
| 0                                                                                   | 0                                                                                   | 1                                                                |
| 0                                                                                   | 0                                                                                   | 1                                                                |
| 0                                                                                   | 0                                                                                   | 1                                                                |
| 0                                                                                   | 0                                                                                   | 1                                                                |
| 0                                                                                   | 0                                                                                   | 1                                                                |
| 0                                                                                   | 0                                                                                   | 1                                                                |
| 0                                                                                   | 0                                                                                   | 0                                                                |
| 0                                                                                   | 0                                                                                   | 0                                                                |
| 0                                                                                   | 0                                                                                   | 1                                                                |
| 0                                                                                   | 0                                                                                   | 1                                                                |
| 0                                                                                   | 0                                                                                   | 1                                                                |
| 0                                                                                   | 0                                                                                   | 1                                                                |
| 0                                                                                   | 0                                                                                   | 1                                                                |
| 0                                                                                   | 0                                                                                   | 0                                                                |
| 0                                                                                   | 0                                                                                   | 1                                                                |
| 0                                                                                   | 0                                                                                   | 1                                                                |
| 0                                                                                   | 1                                                                                   | 1                                                                |
| 0                                                                                   | 0                                                                                   | 1                                                                |
| 0                                                                                   | 0                                                                                   | 1                                                                |
| 0                                                                                   | 0                                                                                   | 0                                                                |
| 0                                                                                   | 0                                                                                   | 1                                                                |

| In trials and cohort studies, do the analyses adjust for different levels of follow-up of patients, or in case-control studies, is the time period between intervention and outcome the same for case and controls? | Were the statistical tests used to assess the main outcomes appropriate? | Was compliance with the intervention/s reliable? |
|---------------------------------------------------------------------------------------------------------------------------------------------------------------------------------------------------------------------|--------------------------------------------------------------------------|--------------------------------------------------|
| 1                                                                                                                                                                                                                   | 1                                                                        | UTD                                              |
| UTD                                                                                                                                                                                                                 | 1                                                                        | 1                                                |
| UTD                                                                                                                                                                                                                 | 1                                                                        | 1                                                |
| UTD                                                                                                                                                                                                                 | 1                                                                        | 1                                                |
| UTD                                                                                                                                                                                                                 | 1                                                                        | UTD                                              |
| UTD                                                                                                                                                                                                                 | 1                                                                        | 1                                                |
| UTD                                                                                                                                                                                                                 | 0                                                                        | UTD                                              |
| UTD                                                                                                                                                                                                                 | 1                                                                        | UTD                                              |
| UTD                                                                                                                                                                                                                 | 1                                                                        | 0                                                |
| UTD                                                                                                                                                                                                                 | 1                                                                        | 0                                                |
| UTD                                                                                                                                                                                                                 | 1                                                                        | 1                                                |
| UTD                                                                                                                                                                                                                 | 1                                                                        | 1                                                |
| 1                                                                                                                                                                                                                   | 1                                                                        | 1                                                |
| UTD                                                                                                                                                                                                                 | 1                                                                        | 1                                                |
| 0                                                                                                                                                                                                                   | 1                                                                        | UTD                                              |
| 1                                                                                                                                                                                                                   | 1                                                                        | 1                                                |
| 0                                                                                                                                                                                                                   | 1                                                                        | 1                                                |
| 0                                                                                                                                                                                                                   | 1                                                                        | 1                                                |
| UTD                                                                                                                                                                                                                 | 1                                                                        | 0                                                |
| 1                                                                                                                                                                                                                   | 1                                                                        | 1                                                |
| 1                                                                                                                                                                                                                   | 1                                                                        | 1                                                |
| UTD                                                                                                                                                                                                                 | 1                                                                        | UTD                                              |
| 1                                                                                                                                                                                                                   | 1                                                                        | 1                                                |

| Were the main outcome measures used accurate (valid and reliable)? | Were the patients in different intervention groups (trials or cohort studies) or were the cases and controls (case-control studies) recruited from the same population? | Were the study subjects in different intervention groups (trials and cohort studies) or were the cases and controls case-control studies) recruited over the same period of time? |
|--------------------------------------------------------------------|-------------------------------------------------------------------------------------------------------------------------------------------------------------------------|-----------------------------------------------------------------------------------------------------------------------------------------------------------------------------------|
| 0                                                                  | UTD                                                                                                                                                                     | UTD                                                                                                                                                                               |
| 1                                                                  | UTD                                                                                                                                                                     | UTD                                                                                                                                                                               |
| 0                                                                  | UTD                                                                                                                                                                     | UTD                                                                                                                                                                               |
| 1                                                                  | UTD                                                                                                                                                                     | UTD                                                                                                                                                                               |
| 1                                                                  | UTD                                                                                                                                                                     | UTD                                                                                                                                                                               |
| 0                                                                  | UTD                                                                                                                                                                     | UTD                                                                                                                                                                               |
| 0                                                                  | UTD                                                                                                                                                                     | UTD                                                                                                                                                                               |
| 1                                                                  | 1                                                                                                                                                                       | UTD                                                                                                                                                                               |
| 1                                                                  | 1                                                                                                                                                                       | UTD                                                                                                                                                                               |
| 1                                                                  | UTD                                                                                                                                                                     | UTD                                                                                                                                                                               |
| 0                                                                  | 1                                                                                                                                                                       | UTD                                                                                                                                                                               |
| 1                                                                  | 1                                                                                                                                                                       | UTD                                                                                                                                                                               |
| 0                                                                  | 1                                                                                                                                                                       | UTD                                                                                                                                                                               |
| 0                                                                  | 0                                                                                                                                                                       | UTD                                                                                                                                                                               |
| 0                                                                  | 1                                                                                                                                                                       | UTD                                                                                                                                                                               |



| Were the study subjects randomised to intervention groups? | Was the randomised intervention assignment concealed from both patients and health care staff until recruitment was complete and irrevocable? | Was there adequate adjustment for confounding in the analyses from which the main findings were drawn? |
|------------------------------------------------------------|-----------------------------------------------------------------------------------------------------------------------------------------------|--------------------------------------------------------------------------------------------------------|
| UTD                                                        | UTD                                                                                                                                           | 1                                                                                                      |
| UTD                                                        | UTD                                                                                                                                           | 0                                                                                                      |
| UTD                                                        | UTD                                                                                                                                           | 0                                                                                                      |
| UTD                                                        | UTD                                                                                                                                           | 1                                                                                                      |
| UTD                                                        | UTD                                                                                                                                           | 0                                                                                                      |
| UTD                                                        | UTD                                                                                                                                           | 1                                                                                                      |
| UTD                                                        | UTD                                                                                                                                           | 0                                                                                                      |
| UTD                                                        | UTD                                                                                                                                           | 0                                                                                                      |
| UTD                                                        | 0                                                                                                                                             | 0                                                                                                      |
| UTD                                                        | UTD                                                                                                                                           | 0                                                                                                      |
| UTD                                                        | UTD                                                                                                                                           | 1                                                                                                      |
| UTD                                                        | UTD                                                                                                                                           | 0                                                                                                      |
| UTD                                                        | UTD                                                                                                                                           | 0                                                                                                      |
| UTD                                                        | UTD                                                                                                                                           | 1                                                                                                      |

| Were losses of patients to follow-up taken into account? | *Did the study have sufficient power to detect a clinically important effect where the probability value for a difference being due to chance is less than 5%? | Total score 0/32 |
|----------------------------------------------------------|----------------------------------------------------------------------------------------------------------------------------------------------------------------|------------------|
| 0                                                        | 1                                                                                                                                                              | 12               |
| 0                                                        | 3                                                                                                                                                              | 15               |
| 0                                                        | 1                                                                                                                                                              | 12               |
| 0                                                        | 2                                                                                                                                                              | 18               |
| 0                                                        | 0                                                                                                                                                              | 10               |
| 1                                                        | 2                                                                                                                                                              | 15               |
| 0                                                        | 4                                                                                                                                                              | 18               |
| 0                                                        | 4                                                                                                                                                              | 13               |
| 0                                                        | 0                                                                                                                                                              | 10               |
| 0                                                        | 1                                                                                                                                                              | 12               |
| 1                                                        | 3                                                                                                                                                              | 14               |
| 1                                                        | 4                                                                                                                                                              | 16               |
| 0                                                        | 1                                                                                                                                                              | 8                |
| 0                                                        | 3                                                                                                                                                              | 14               |
| 0                                                        | 3                                                                                                                                                              | 13               |
| 0                                                        | 2                                                                                                                                                              | 17               |
| 0                                                        | 1                                                                                                                                                              | 15               |
| 1                                                        | 1                                                                                                                                                              | 16               |
| 0                                                        | 0                                                                                                                                                              | 13               |
| 3                                                        | 3                                                                                                                                                              | 13               |
| 0                                                        | 4                                                                                                                                                              | 17               |
| 0                                                        | 4                                                                                                                                                              | 19               |
| 0                                                        | 2                                                                                                                                                              | 16               |
| 1                                                        | 0                                                                                                                                                              | 13               |
| 0                                                        | 1                                                                                                                                                              | 16               |
| 0                                                        | 0                                                                                                                                                              | 11               |
| 0                                                        | 0                                                                                                                                                              | 7                |
| 1                                                        | 2                                                                                                                                                              | 19               |
